# Supplementary material for: Natural Killer Cells-Produced IFN-γ Improves Bone Marrow-Derived Hepatocytes Regeneration in Murine Liver Failure Model
Source: PubMed Central journal article supplement (PMC4561890; doi:10.1038/srep13687), 2015-09-08
Supplement: srep13687-s1.pdf [file srep13687-s1.pdf]

# Natural Killer Cells-Produced IFN- $\gamma$ Improves Bone Marrow-Derived Hepatocytes

## Regeneration in Murine Liver Failure Model

**Authors:** Lu Li<sup>1</sup>, Zhutian Zeng<sup>1</sup>, Ziping Qi<sup>1</sup>, Xin Wang<sup>3</sup>, Xiang Gao<sup>4</sup>, Haiming Wei<sup>1</sup>, Rui Sun<sup>1,2</sup>, and Zhigang Tian<sup>1,2\*</sup>

### Supplementary Figures and legends:

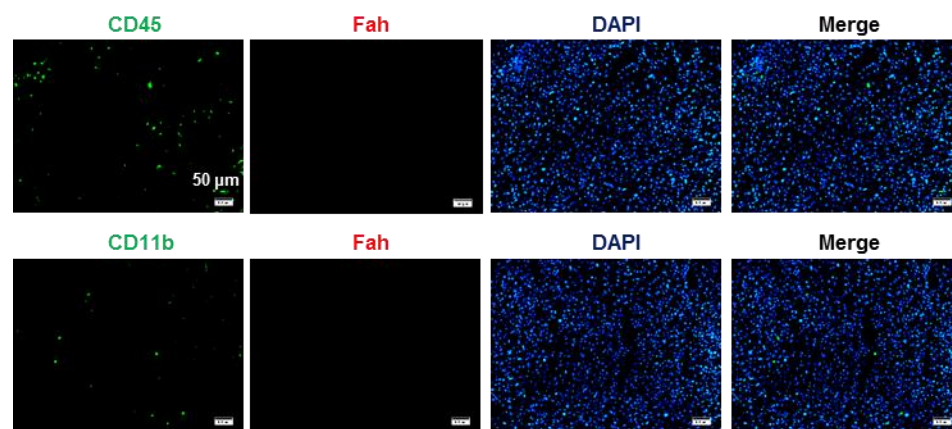

**Supplementary Fig. S1. Immunofluorescence staining of liver tissues from control *Fah*<sup>-/-</sup> mice.**

Liver tissues of *Fah*<sup>-/-</sup> control mice were collected and stained for Fah (red) and CD45 or CD11b (green) by immunofluorescence (scale bar, 50 μm).

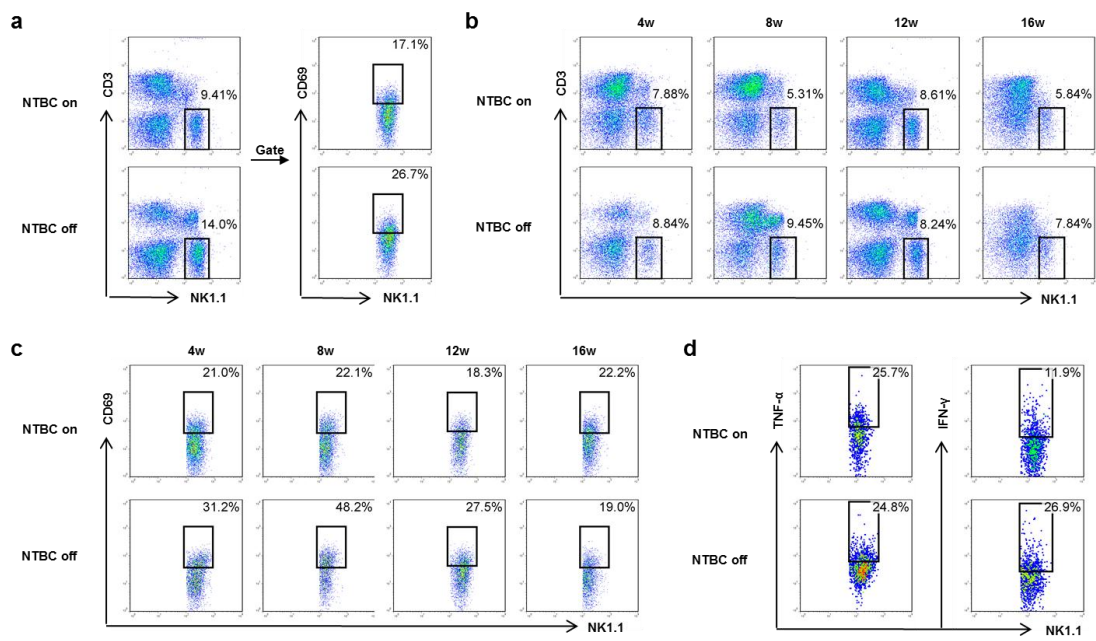

**Supplementary Fig. S2. Representative FACS plots of NK cells frequencies and their**

**activation states after NTBC withdrawal. (a) Representative FACS plots of Fig. 2a. (b)**

**Representative FACS plots of Fig. 3a. (c) Representative FACS plots of Fig. 3b. (d)**

**Representative FACS plots of Fig. 3c.**

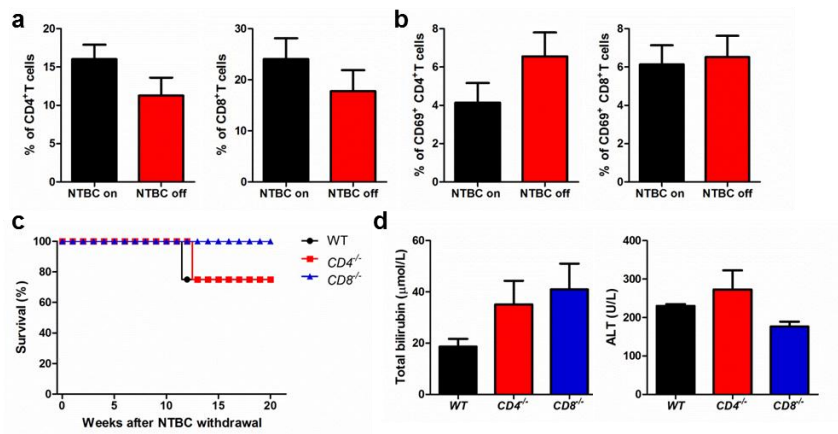

**Supplementary Fig. S3. T cells are not involved hepatic reconstitution.** Hepatic CD4<sup>+</sup> and CD8<sup>+</sup>T cell percentage (**a**) and CD69 expression (**b**) in *Fah*<sup>-/-</sup>mice 16 weeks after WT BMT and 12 weeks after NTBC withdrawal. *Fah*<sup>-/-</sup>mice were transplanted with *CD4*<sup>-/-</sup> (*n*=4), *CD8*<sup>-/-</sup> (*n*=4), or WT (*n*=4) BMCs, and (c) survival rate was monitored. (d) Total serum bilirubin and ALT levels were detected 16 weeks after NTBC withdrawal.

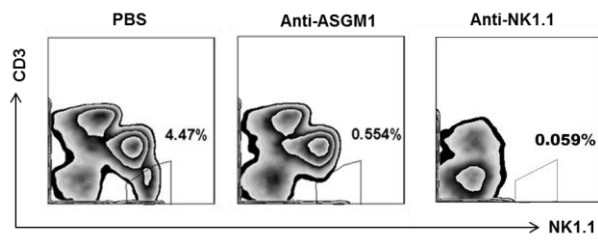

**Supplementary Fig. S4. Validation of antibody mediated depletion of NK cells.**

WT mice were treated with anti-ASGM1 or anti-NK1.1, hepatic NK cells (CD3<sup>+</sup>NK1.1<sup>+</sup>) were evaluated by flow cytometry 3 days later.

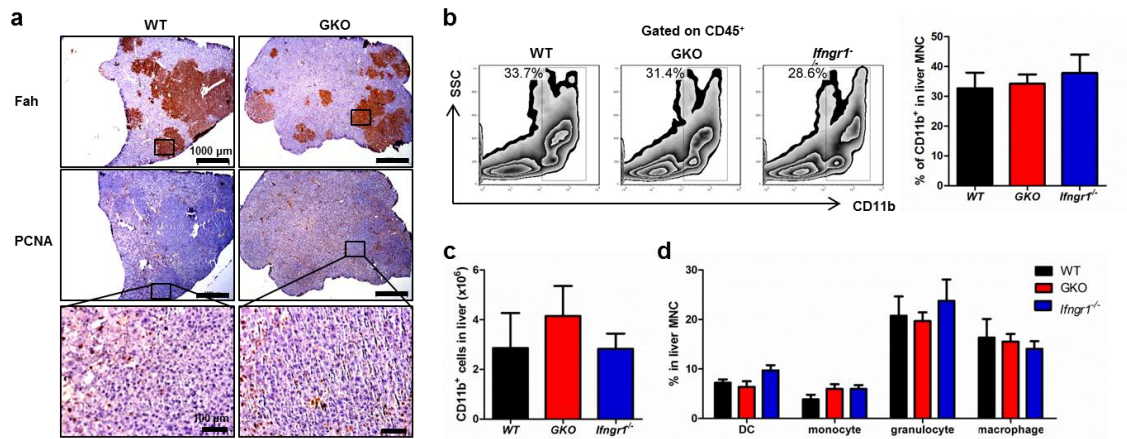

**Supplementary Fig. S5. IFN- $\gamma$  signaling deficiency does not alter expansion of BMDHs or liver myelomonocytic cell subsets.** (a) Liver tissues of *Fah*<sup>-/-</sup> mice transplanted with GKO or WT BMCs were collected 20 weeks after NTBC withdrawal for immunohistochemical staining of Fah and PCNA (scale bar, 1000  $\mu$ m for top and middle; 100  $\mu$ m for bottom). (b) Four weeks after being transplanted with GKO or *Ifngr1*<sup>-/-</sup> BMCs, hepatic mononuclear cells (MNCs) were isolated from *Fah*<sup>-/-</sup> mice and examined by flow cytometry. The percentage of CD11b<sup>+</sup> cells is shown. (c) Total CD11b<sup>+</sup> cell number in liver MNCs. (d) The percentage of CD11c<sup>+</sup> DCs, CD11b<sup>+</sup>Ly6C<sup>+</sup>Ly6G<sup>-</sup> monocytes, CD11b<sup>+</sup>Ly6C<sup>+</sup>Ly6G<sup>+</sup> granulocytes, and CD11b<sup>+</sup>F4/80<sup>+</sup> macrophages in liver MNCs. Data are expressed as the mean  $\pm$  SEM.

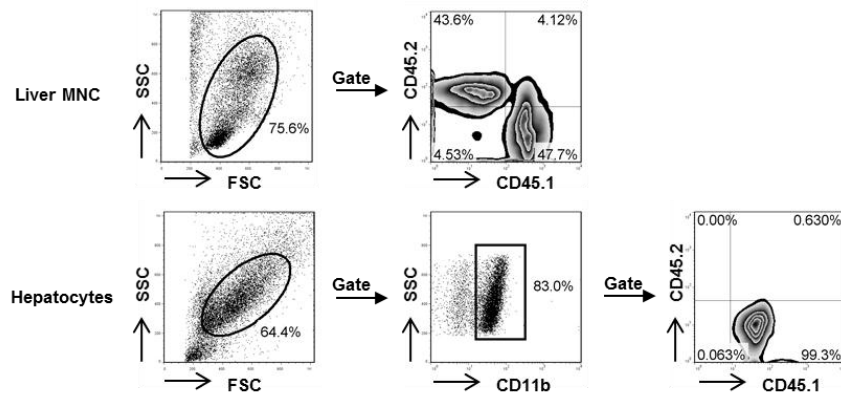

**Supplementary Fig. S6. Gating strategy for Fig.6d-e**

Liver Mononuclear Cells (MNCs) or hepatocytes of *Fah*<sup>-/-</sup> mice transplanted with a 1:1 mixture of WT (CD45.1) and *Ifngr1*<sup>-/-</sup> (CD45.2) BMCs were evaluated by flow cytometry.

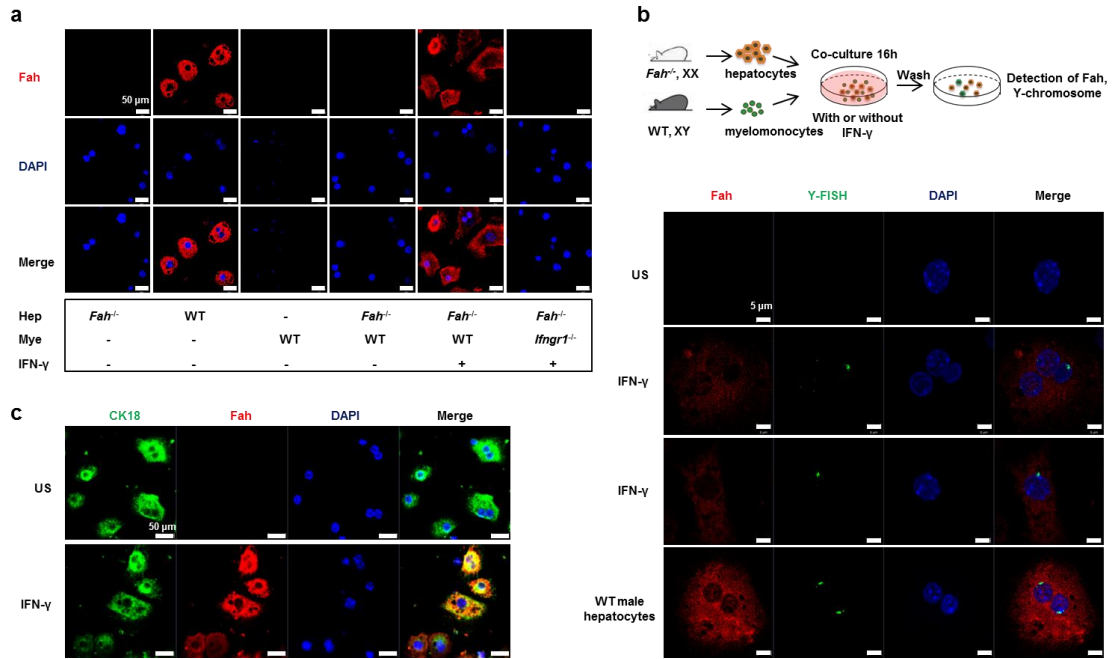

**Supplementary Fig. S7. IFN- $\gamma$ -IFN- $\gamma$ R interaction contributes to cellular fusion in vitro. (a)**

The controls of in vitro co-culture system were shown for Fah (red) and DAPI (blue) (scale bar, 50

$\mu\text{m}$ ). (b) Female *Fah*<sup>-/-</sup> hepatocytes were co-cultured with male splenic myelomonocytes for 16 h

in the absence (unstimulated [US]) or presence of 1 ng/mL IFN- $\gamma$  and then stained for Fah (red)

and DAPI (blue), Y-chromosomes (green) were detected later by fluorescence in situ hybridization

(scale bar, 5  $\mu\text{m}$ ). WT male hepatocytes were used as positive control. (c) *Fah*<sup>-/-</sup> hepatocytes were

co-cultured with splenic myelomonocytes for 16 h in the absence (unstimulated [US], top) or

presence (bottom) of 1 ng/mL IFN- $\gamma$  and then stained for CK18 (green), Fah (red) and DAPI (blue)

(scale bar, 50  $\mu\text{m}$ ).
